# Supplementary material for: Pregnancy-Related Complications in Women with Recurrent Pregnancy Loss: A Prospective Cohort Study
Source: MDPI journal article supplement (doi:10.3390/jcm9092833), 2020-09-01
Supplement: s1 [file s1]

**Supplementary Table S1: Detail of the factorial analysis of effect size of age on pregnancy complications in study women.**

| AGE                                   |                                                |            |             |          |
|---------------------------------------|------------------------------------------------|------------|-------------|----------|
| Complication                          | Comparisons                                    | $\Delta\%$ | Student's t | p-Value  |
| Threatened miscarriage                | {Cases - Controls}                             | 8.3        | 1084.449    | < 0.0001 |
|                                       | {{(Age > M) - (Age ≤ M)}}                      | - 0.9      | - 117.591   | < 0.0001 |
|                                       | {{(Cases - Controls) x ((Age >M) - (Age ≤M))}} | 2.7        | 352.773     | < 0.0001 |
| Miscarriage                           | {Cases - Controls}                             | 11.1       | 1484.71     | < 0.0001 |
|                                       | {{(Age > M) - (Age ≤ M)}}                      | 4.8        | 642.037     | < 0.0001 |
|                                       | {{(Cases - Controls) x ((Age >M) - (Age ≤M))}} | - 4.8      | - 642.037   | < 0.0001 |
| Cervical insufficiency                | {Cases - Controls}                             | 4.2        | 923.141     | < 0.0001 |
|                                       | {{(Age > M) - (Age ≤ M)}}                      | - 0.1      | -21.98      | < 0.0001 |
|                                       | {{(Cases - Controls) x ((Age >M) - (Age ≤M))}} | 0.1        | 21.98       | < 0.0001 |
| Chromosomal abnormalities             | {Cases - Controls}                             | 2.5        | 700.609     | < 0.0001 |
|                                       | {{(Age > M) - (Age ≤ M)}}                      | 1.4        | 392.341     | < 0.0001 |
|                                       | {{(Cases - Controls) x ((Age >M) - (Age ≤M))}} | 2.5        | 700.609     | < 0.0001 |
| Fetal anomalies                       | {Cases - Controls}                             | 3.7        | 695.604     | < 0.0001 |
|                                       | {{(Age > M) - (Age ≤ M)}}                      | - 0.9      | -169.201    | < 0.0001 |
|                                       | {{(Cases - Controls) x ((Age >M) - (Age ≤M))}} | 1.6        | 300.802     | < 0.0001 |
| Oligohydramnios                       | {Cases - Controls}                             | 2.1        | 508.698     | < 0.0001 |
|                                       | {{(Age > M) - (Age ≤ M)}}                      | 0.3        | 72.671      | < 0.0001 |
|                                       | {{(Cases - Controls) x ((Age >M) - (Age ≤M))}} | 2.4        | 581.369     | < 0.0001 |
| Polyhydramnios                        | {Cases - Controls}                             | 0.2        | 71.741      | < 0.0001 |
|                                       | {{(Age > M) - (Age ≤ M)}}                      | - 0.8      | - 286.966   | < 0.0001 |
|                                       | {{(Cases - Controls) x ((Age >M) - (Age ≤M))}} | 1.5        | 538.061     | < 0.0001 |
| Fetal growth restriction              | {Cases - Controls}                             | 0.1        | 19.632      | < 0.0001 |
|                                       | {{(Age > M) - (Age ≤ M)}}                      | 1.8        | 353.384     | < 0.0001 |
|                                       | {{(Cases - Controls) x ((Age >M) - (Age ≤M))}} | -1.8       | -353.384    | < 0.0001 |
| Intrauterine fetal death              | {Cases - Controls}                             | 1.0        | 439.239     | < 0.0001 |
|                                       | {{(Age > M) - (Age ≤ M)}}                      | - 0.1      | - 43.924    | < 0.0001 |
|                                       | {{(Cases - Controls) x ((Age >M) - (Age ≤M))}} | 0.6        | 263.543     | < 0.0001 |
| GDM                                   | {Cases - Controls}                             | 6.3        | 830.45      | < 0.0001 |
|                                       | {{(Age > M) - (Age ≤ M)}}                      | 0.9        | 118.636     | < 0.0001 |
|                                       | {{(Cases - Controls) x ((Age >M) - (Age ≤M))}} | 3.2        | 421.816     | < 0.0001 |
| Preeclampsia                          | {Cases - Controls}                             | 5.6        | 710.734     | < 0.0001 |
|                                       | {{(Age > M) - (Age ≤ M)}}                      | - 2.5      | -317.292    | < 0.0001 |
|                                       | {{(Cases - Controls) x ((Age >M) - (Age ≤M))}} | 2.5        | 317.292     | < 0.0001 |
| Placentaprevia/<br>Low-lying placenta | {Cases - Controls}                             | 1.9        | 514.398     | < 0.0001 |
|                                       | {{(Age > M) - (Age ≤ M)}}                      | 0          | 0           | n.s.     |
|                                       | {{(Cases - Controls) x ((Age >M) - (Age ≤M))}} | 0.4        | 108.294     | < 0.0001 |
| Placental abruptio                    | {Cases - Controls}                             | 2.3        | 397.204     | < 0.0001 |
|                                       | {{(Age > M) - (Age ≤ M)}}                      | 0.5        | 86.349      | < 0.0001 |
|                                       | {{(Cases - Controls) x ((Age >M) - (Age ≤M))}} | 2.9        | 500.823     | < 0.0001 |
| Pregnancy-related liver disorders     | {Cases - Controls}                             | 6.5        | 1150.595    | < 0.0001 |
|                                       | {{(Age > M) - (Age ≤ M)}}                      | 1.5        | 265.522     | < 0.0001 |
|                                       | {{(Cases - Controls) x ((Age >M) - (Age ≤M))}} | 3.4        | 601.85      | < 0.0001 |
| Preterm Prom                          | {Cases - Controls}                             | 5.1        | 947.299     | < 0.0001 |
|                                       | {{(Age > M) - (Age ≤ M)}}                      | 0.9        | 167.17      | < 0.0001 |
|                                       | {{(Cases - Controls) x ((Age >M) - (Age ≤M))}} | 4.5        | 835.852     | < 0.0001 |

M = Median; For each specific issue in the first line it has been calculated the increased rate of complication occurrence between cases and controls; in the second line it has been calculated the effect of age by stratifying the ages of cases and controls according to the median of the whole population; in the third line it has been calculated the interaction between the rates reported in the two preceding lines. n.s. = not significant.

**Supplementary Table S2: Detail of the factorial analysis of effect size of BMI on pregnancy complications in study women.**

| BMI                                    |                                              |            |             |          |
|----------------------------------------|----------------------------------------------|------------|-------------|----------|
| Complication                           | Comparison                                   | $\Delta\%$ | Student's t | p-value  |
| Threatened miscarriage                 | {Cases - Controls}                           | 12.1       | 784.581     | < 0.0001 |
|                                        | {(BMI > M) - (BMI ≤ M)}                      | 1.9        | 123.199     | < 0.0001 |
|                                        | {(Cases - Controls) x ((BMI >M) - (BMI ≤M))} | 1.1        | 71.326      | < 0.0001 |
| Miscarriage                            | {Cases - Controls}                           | 18.4       | 1153.341    | < 0.0001 |
|                                        | {(BMI> M) - (BMI ≤ M)}                       | 3.3        | 346.167     | < 0.0001 |
|                                        | {(Cases - Controls) x ((BMI >M) - (BMI ≤M))} | -1.7       | -178.328    | < 0.0001 |
| Cervical insufficiency                 | {Cases - Controls}                           | 4.6        | 423.087     | < 0.0001 |
|                                        | {(BMI > M) - (BMI ≤ M)}                      | 2.3        | 211.543     | < 0.0001 |
|                                        | {(Cases - Controls) x ((BMI >M) - (BMI ≤M))} | 0.3        | 27.593      | < 0.0001 |
| Chromosomal abnormalities              | {Cases - Controls}                           | 11.8       | 1003.351    | < 0.0001 |
|                                        | {(BMI > M) - (BMI ≤ M)}                      | 3.3        | 280.598     | < 0.0001 |
|                                        | {(Cases - Controls) x ((BMI >M) - (BMI ≤M))} | 4.8        | 408.143     | < 0.0001 |
| Fetal anomalies                        | {Cases - Controls}                           | 3.0        | 269.727     | < 0.0001 |
|                                        | {(BMI > M) - (BMI ≤ M)}                      | 2.1        | 188.809     | < 0.0001 |
|                                        | {(Cases - Controls) x ((BMI >M) - (BMI ≤M))} | 1.9        | 170.827     | < 0.0001 |
| OLIGOAMN                               | {Cases - Controls}                           | 2.5        | 314.231     | < 0.0001 |
|                                        | {(BMI > M) - (BMI ≤ M)}                      | 0.2        | 25.139      | < 0.0001 |
|                                        | {(Cases - Controls) x ((BMI >M) - (BMI ≤M))} | -0.3       | -37.708     | < 0.0001 |
| Polyhydramnios                         | {Cases - Controls}                           | 1.1        | 238.692     | < 0.0001 |
|                                        | {(BMI > Median) - (BMI ≤ Median)}            | 1.5        | 325.489     | < 0.0001 |
|                                        | {(Cases - Controls) x ((BMI >M) - (BMI ≤M))} | 0.3        | 65.098      | < 0.0001 |
| Fetal growth restriction               | {Cases - Controls}                           | 3.8        | 431.183     | < 0.0001 |
|                                        | {(BMI > M) - (BMI ≤ M)}                      | 3.1        | 351.755     | < 0.0001 |
|                                        | {(Cases - Controls) x ((BMI >M) - (BMI ≤M))} | -0.3       | -34.041     | < 0.0001 |
| Intrauterine fetal death               | {Cases - Controls}                           | 1.1        | 238.57      | < 0.0001 |
|                                        | {(BMI > M) - (BMI ≤ M)}                      | 0.9        | 195.194     | < 0.0001 |
|                                        | {(Cases - Controls) x ((BMI >M) - (BMI ≤M))} | 0.9        | 195.194     | < 0.0001 |
| GDM                                    | {Cases - Controls}                           | 8.7        | 554.605     | < 0.0001 |
|                                        | {(BMI > M) - (BMI ≤ M)}                      | 6.6        | 420.735     | < 0.0001 |
|                                        | {(Cases - Controls) x ((BMI >M) - (BMI ≤M))} | 0.7        | 44.623      | < 0.0001 |
| Preeclampsia                           | {Cases - Controls}                           | 9.9        | 603.84      | < 0.0001 |
|                                        | {(BMI > M) - (BMI ≤ M)}                      | 8.9        | 542.846     | < 0.0001 |
|                                        | {(Cases - Controls) x ((BMI >M) - (BMI ≤M))} | 0.8        | 48.795      | < 0.0001 |
| Placenta previa/<br>Low-lying placenta | {Cases - Controls}                           | 3.4        | 397.276     | < 0.0001 |
|                                        | {(BMI > M) - (BMI ≤ M)}                      | 1.5        | 175.269     | < 0.0001 |
|                                        | {(Cases - Controls) x ((BMI >M) - (BMI ≤M))} | -0.5       | -58.423     | < 0.0001 |
| Placental abruptio                     | {Cases - Controls}                           | 4.7        | 373.649     | < 0.0001 |
|                                        | {(BMI > M) - (BMI ≤ M)}                      | 0.4        | 31.8        | < 0.0001 |
|                                        | {(Cases - Controls) x ((BMI >M) - (BMI ≤M))} | 0.3        | 23.85       | < 0.0001 |
| Pregnancy-related liver disorders      | {Cases - Controls}                           | 7.8        | 683.282     | < 0.0001 |
|                                        | {(BMI > M) - (BMI ≤ M)}                      | 1.6        | 140.16      | < 0.0001 |
|                                        | {(Cases - Controls) x ((BMI >M) - (BMI ≤M))} | -1.5       | -131.4      | < 0.0001 |
| Preterm Prom                           | {Cases - Controls}                           | 4.6        | 423.087     | < 0.0001 |
|                                        | {(BMI > M) - (BMI ≤ M)}                      | 3.6        | 331.111     | < 0.0001 |
|                                        | {(Cases - Controls) x ((BMI >M) - (BMI ≤M))} | 0.3        | 27.593      | < 0.0001 |

M = Median; For each specific issue in the first line it has been calculated the increased rate of complication occurrence between cases and controls; in the second line it has been calculated the effect of age by stratifying the ages of cases and controls according to the median of the whole population; in the third line it has been calculated the interaction between the rates reported in the two preceding lines. n.s. = not significant.

**Supplementary Table S3: Detail of the occurrence of the pregnancy-related liver disorders.**

| Pregnancy-related liver disorder          | Number of cases |
|-------------------------------------------|-----------------|
| Intrahepatic cholestasis of pregnancy     | 8 cases         |
| Acute fatty liver of pregnancy            | 1 case          |
| Isolated abnormal liver enzymes           | 29 cases        |
| Biliary obstruction by gallbladder stones | 2 cases         |

The above list include the overall findings observed in all the study women and are not limited to women with RPL. They have been stratified as a whole and not by specific complication between women of the two study groups due to the very low numbers of events in the case of AFLP and BO.

**Supplementary Table S4: Rates of pregnancy complications in women with RPL according to the number of previous pregnancy losses.**

|                                              | Number of Previous Losses (%) |              |             |            |           |           |          |          |
|----------------------------------------------|-------------------------------|--------------|-------------|------------|-----------|-----------|----------|----------|
|                                              | 2 Losses                      | 3 Losses     | 4 Losses    | 5 Losses   | 6 Losses  | 7 Losses  | 8 Losses | 9 Losses |
| Women who become pregnant (n = 431)          | 209 (48.4 %)                  | 123 (28.5 %) | 60 (13.9 %) | 25 (5.8 %) | 7 (1.6 %) | 4 (0.9 %) | 2 (0.4%) | 1 (0.2%) |
| Women with pregnancy complications (n = 231) | 99 (47.3%)                    | 68 (55.3%)   | 39 (65%)    | 15 (60%)   | 5 (71.4%) | 4 (100%)  | 1 (50%)  | N.A.     |

N.A. = not available;  $r = 0.993$ ,  $p < 0.0001$ .

**Supplementary Table S5 – Pregnancy complications in women with RPL according to the main diagnostic categories - Unexplained /Explained.**

|                                   | Women with unexplained RPL<br>[n = 172] (%) | Women with explained RPL<br>[n = 259] (%) | OR<br>(95% CI)       | p-value  |
|-----------------------------------|---------------------------------------------|-------------------------------------------|----------------------|----------|
| Women with complications          | 94<br>(54.65%)                              | 137<br>(52.89%)                           |                      |          |
| Threatened miscarriage            | 21 (12.2%)                                  | 30 (11.6%)                                | 1.06<br>(0.58–1.92)  | 0.84, NS |
| Spontaneous miscarriage           | 20 (11.6%)                                  | 35 (13.5%)                                | 0.84<br>(0.46–1.51)  | 0.56, NS |
| Cervical insufficiency            | 11 (6.4%)                                   | 10 (3.8%)                                 | 1.70<br>(0.70–4.09)  | 0.23, NS |
| Chromosomal/genetic abnormalities | 2 (1.2%)                                    | 10 (3.8%)                                 | 0.29<br>(0.06–1.35)  | 0.11, NS |
| Fetal anomalies                   | 7 (4.0%)                                    | 12 (4.6%)                                 | 0.87<br>(0.33–2.26)  | 0.78, NS |
| Oligohydramnios                   | 5 (2.9%)                                    | 8 (3.1%)                                  | 0.93<br>(0.30–2.92)  | 0.91, NS |
| Polyhydramnios                    | 2 (1.2%)                                    | 2 (0.8%)                                  | 1.51<br>(0.21–10.83) | 0.68, NS |
| Fetal growth restriction          | 6 (3.5%)                                    | 8 (3.1%)                                  | 1.13<br>(0.38–3.32)  | 0.81, NS |
| Intrauterine fetal death          | 4 (2.3%)                                    | 1 (3.4%)                                  | 6.14<br>(0.68–55.43) | 0.10, NS |
| Gestational diabetes mellitus     | 15 (8.7%)                                   | 28 (10.8%)                                | 0.78<br>(0.40–1.52)  | 0.47, NS |
| Preeclampsia                      | 27 (15.7%)                                  | 19 (7.4%)                                 | 2.35<br>(1.26–4.38)  | < 0.05   |
| Placenta previa                   | 5 (2.9%)                                    | 6 (2.3%)                                  | 1.26<br>(0.37–4.20)  | 0.70, NS |
| Abruptio placentae                | 8 (4.6%)                                    | 16 (6.2%)                                 | 0.74<br>(0.30–1.77)  | 0.49, NS |
| Pregnancy-related liver disorders | 19 (11.0%)                                  | 13 (5.0%)                                 | 2.34<br>(1.12–4.89)  | < 0.05   |
| Preterm PROM                      | 11 (6.3%)                                   | 17 (6.5%)                                 | 0.97<br>(0.44–2.13)  | 0.94, NS |

NS = Not significant.

**Supplementary Table S6: Pregnancy complications in women with RPL according to the main diagnostic categories – Primary/Secondary.**

| Women with complications          | Women with primary RPL [n = 284] (%) | Women with secondary RPL<br>[n = 147] (%) | OR (95% CI)          | p-value  |
|-----------------------------------|--------------------------------------|-------------------------------------------|----------------------|----------|
|                                   | 138 (48.59%)                         | 93 (63.26%)                               |                      |          |
| Threatened miscarriage            | 31 (10.91%)                          | 20 (13.6%)                                | 0.77<br>(0.42–1.41)  | 0.41, NS |
| Spontaneous miscarriage           | 35 (12.32%)                          | 20 (13.6%)                                | 0.89<br>(0.49–1.60)  | 0.70, NS |
| Cervical insufficiency            | 12 (4.22%)                           | 9 (6.11%)                                 | 0.69<br>(0.28–1.69)  | 0.42, NS |
| Chromosomal/genetic abnormalities | 6 (2.11%)                            | 6 (4.08%)                                 | 0.50<br>[0.16–1.60]  | 0.24, NS |
| Fetal anomalies                   | 11 (3.87%)                           | 8 (5.44%)                                 | 0.70<br>(0.27–1.78)  | 0.45, NS |
| Oligohydramnios                   | 6 (2.11%)                            | 7 (4.76%)                                 | 0.43<br>(0.14–1.30)  | 0.13, NS |
| Polyhydramnios                    | 1 (0.35%)                            | 3 (2.04%)                                 | 0.16<br>(0.01–1.64)  | 0.12, NS |
| Fetal growth restriction          | 9 (3.16%)                            | 5 (3.40%)                                 | 0.92<br>(0.30–2.82)  | 0.89, NS |
| Intrauterine fetal death          | 4 (1.4%)                             | 1 (0.68%)                                 | 2.08<br>(0.23–18.83) | 0.51, NS |
| Gestational diabetes mellitus     | 20 (7.04%)                           | 23 (15.64%)                               | 0.40<br>(0.21–0.77)  | < 0.01   |
| Preclampsia                       | 29 (10.21%)                          | 17 (11.56%)                               | 0.86<br>(0.46–1.64)  | 0.66, NS |
| Placenta previa                   | 6 (2.11%)                            | 5 (3.40%)                                 | 0.61<br>(0.18–2.04)  | 0.42, NS |
| Abruptio placentae                | 12 (4.22%)                           | 12 (8.16%)                                | 0.49<br>(0.21–1.13)  | 0.09, NS |
| Pregnancy-related liver disorders | 21 (7.39%)                           | 11 (7.48%)                                | 0.98<br>(0.46–2.10)  | 0.97, NS |
| Preterm PROM                      | 21 (7.39%)                           | 7 (4.76%)                                 | 1.59<br>(0.66–3.84)  | 0.29, NS |

NS = not significant.
